# Supplementary material for: Evaluation of repeated dosing of a dexmedetomidine oromucosal gel for treatment of noise aversion in dogs over a series of noise events
Source: PubMed Central journal article supplement — Vet Rec. 2020 Dec 17;187(12):489. doi: 10.1136/vr.106046 (PMC7848045; doi:10.1136/vr.106046), 2020-12-17
Supplement: vr.106046supp001.pdf [file vr.106046supp001.pdf]

Supplementary Table 1. Proportion of responses for remaining Burden-of-Care survey items with less than 25% agreement from owners.

|                                                                                                                                                  | Strongly disagree | Disagree | Neither agree nor disagree | Agree | Strongly agree | Total disagree | Total agree |
|--------------------------------------------------------------------------------------------------------------------------------------------------|-------------------|----------|----------------------------|-------|----------------|----------------|-------------|
| In the past four weeks I have been <b>unable to care</b> for my dog as much as I would have liked to                                             | 0.46              | 0.29     | 0.08                       | 0.17  | 0              | 0.75           | 0.17        |
| In the past four weeks my <b>health</b> has been negatively affected by caring for my dog                                                        | 0.62              | 0.29     | 0                          | 0.08  | 0              | 0.92           | 0.08        |
| In the past four weeks, caring for my dog has negatively affected my <b>social life</b>                                                          | 0.42              | 0.42     | 0.08                       | 0.08  | 0              | 0.83           | 0.08        |
| In the past four weeks I have been <b>uncomfortable having guests</b> (e.g. family, friends, neighbors) visit my home because of my dog's health | 0.54              | 0.29     | 0.08                       | 0.08  | 0              | 0.83           | 0.08        |
| In the past four weeks, caring for my dog has limited the <b>time I have to myself</b>                                                           | 0.5               | 0.29     | 0.08                       | 0.12  | 0              | 0.79           | 0.12        |
| In the past four weeks I have <b>missed time at work</b> because of my dog's health                                                              | 0.71              | 0.29     | 0                          | 0     | 0              | 1              | 0           |
| In the past four weeks I have had to <b>help my dog complete tasks</b> it could previously do on its own (e.g. climb stairs, eating, walking)    | 0.46              | 0.21     | 0.04                       | 0.21  | 0.04           | 0.67           | 0.25        |
| In the past four weeks I have had to change the way I do my <b>daily activities</b> because of my dog's health                                   | 0.42              | 0.33     | 0                          | 0.25  | 0              | 0.75           | 0.25        |
| In the past four weeks I have to do <b>more household chores</b> (e.g. cleaning, washing clothes, preparing food) because of my dog's health     | 0.54              | 0.42     | 0.04                       | 0     | 0              | 0.96           | 0           |
| In the past four weeks my dog's health has negatively affected the                                                                               | 0.54              | 0.29     | 0.04                       | 0.08  | 0.04           | 0.83           | 0.12        |

|                                                                                                                                                                                    |      |      |      |      |      |      |      |
|------------------------------------------------------------------------------------------------------------------------------------------------------------------------------------|------|------|------|------|------|------|------|
| <b>relationship I have with my dog</b>                                                                                                                                             |      |      |      |      |      |      |      |
| In the past four weeks my dog has been <b>more dependent</b> on me than in the past                                                                                                | 0.42 | 0.25 | 0.17 | 0.12 | 0.04 | 0.67 | 0.17 |
| In the past four weeks I have found it <b>difficult</b> to give my dog its <b>treatment or medication</b>                                                                          | 0.37 | 0.17 | 0.04 | 0    | 0    | 0.54 | 0    |
| In the past four weeks I have considered <b> euthanizing</b> my dog due to its <b>health</b>                                                                                       | 1    | 0    | 0    | 0    | 0    | 1    | 0    |
| In the past four weeks I have found it <b>challenging</b> to cover the <b>financial costs</b> of caring for my dog's <b>health</b>                                                 | 0.71 | 0.17 | 0.12 | 0    | 0    | 0.88 | 0    |
| In the past four weeks I have had to <b>make changes to my home</b> (e.g. installing gates, limit access to areas of the home, raised food bowl) because of my dog's <b>health</b> | 0    | 0    | 0    | 0    | 0    | 0    | 0    |
| In the past four weeks I have <b>found it challenging to make changes</b> to my home for my dog's <b>health</b>                                                                    | 0    | 0    | 0    | 0    | 0    | 0    | 0    |
| In the past four weeks my dog has required <b>more care than I expected</b> when I first got my dog                                                                                | 0.42 | 0.29 | 0.21 | 0.08 | 0    | 0.71 | 0.08 |
| In the past four weeks I have considered <b>giving my dog away to someone else</b> because of its <b>health</b>                                                                    | 1    | 0    | 0    | 0    | 0    | 1    | 0    |
| In the past four weeks I felt that I could <b>no longer care for my dog</b>                                                                                                        | 0.87 | 0.08 | 0.04 | 0    | 0    | 0.96 | 0    |
| In the past four weeks I have had <b>difficulty caring for my dog</b> the way my veterinarian recommended                                                                          | 0.79 | 0.17 | 0    | 0.04 | 0    | 0.96 | 0.04 |
| Overall, in the past four weeks I have felt <b>burdened</b> by the care I provided for my dog                                                                                      | 0.5  | 0.29 | 0.12 | 0.08 | 0    | 0.79 | 0.08 |
